# Supplementary material for: Cobalt–benzimidazole swapped metal–organic macrocycle with reduced graphene oxide as a hybrid electrocatalyst for highly efficient oxygen evolution reaction
Source: Royal Society of Chemistry journal article supplement (doi:10.1039/d3lf00193h), 2023-11-27
Supplement: d3lf00193h1.pdf [file d3lf00193h1.pdf]

## **SUPPORTING INFORMATION**

### **Cobalt Benzimidazole Swapped Metal-Organic Macrocycle with Reduced Graphene Oxide as a Hybrid Electrocatalyst for Highly Efficient Oxygen Evolution Reaction**

*Dr. C.P. Keshavananda Prabhu<sup>\*a1</sup>, Dr. Kenkera Rayappa Naveen<sup>b1</sup>, Prof. Jaehyun Hur<sup>\*a</sup>*

*<sup>1</sup>These authors contributed equally*

*\*These authors equal corresponding authorships*

<sup>a</sup> Department of Chemical and Biological Engineering, Gachon University, Gyeonggi-do, Seongnam-si 13120, South Korea

<sup>b</sup> Institut für Anorganische Chemie and Institute for Sustainable Chemistry & Catalysis with Boron, Julius-Maximilians-Universität Würzburg, Am Hubland, 97074 Würzburg, Germany.

Email: [keshavmgm@gmail.com](mailto:keshavmgm@gmail.com); [jhhur@gachon.ac.kr](mailto:jhhur@gachon.ac.kr)

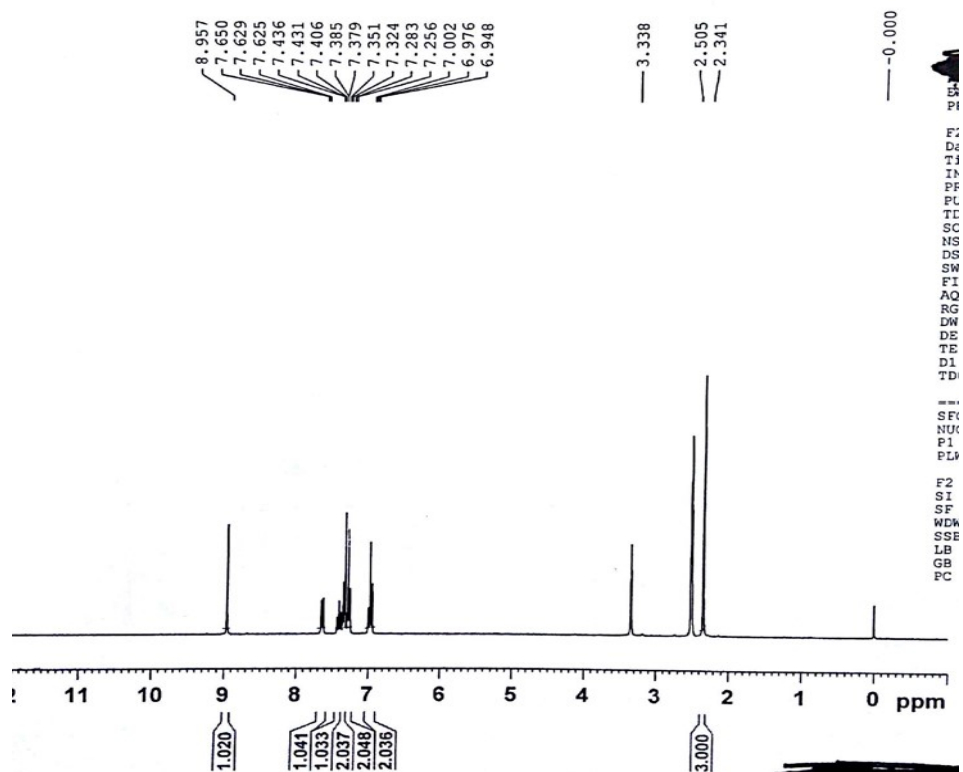

Figure S1. NMR spectra for precursor compound (I)

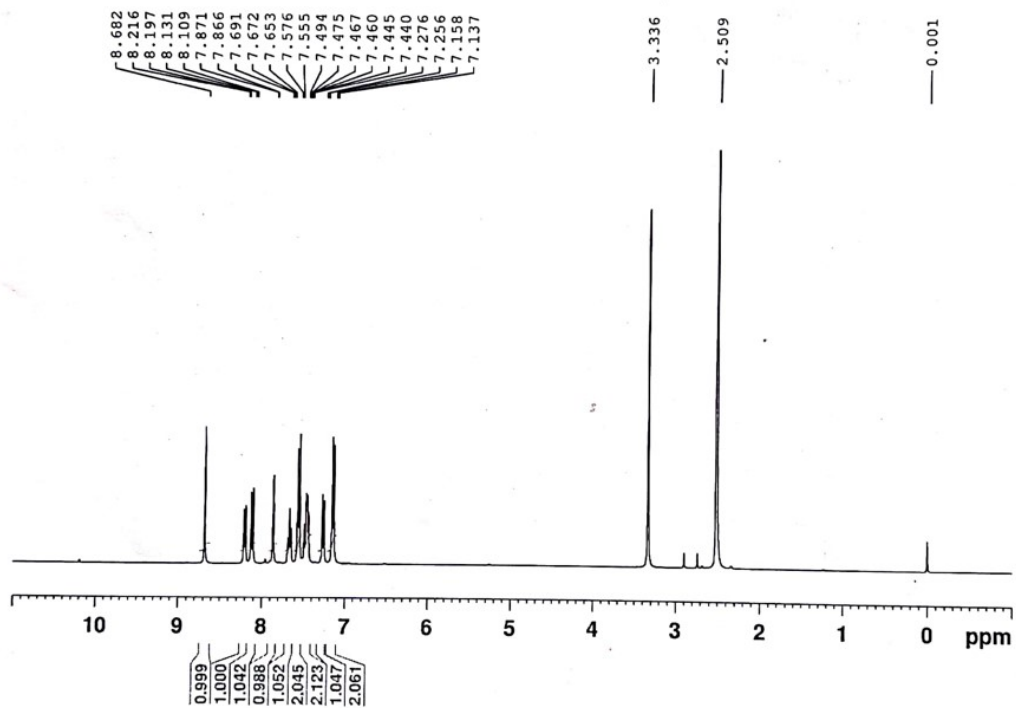

Figure S2. NMR spectra for phthalonitrile ligand (II)

10

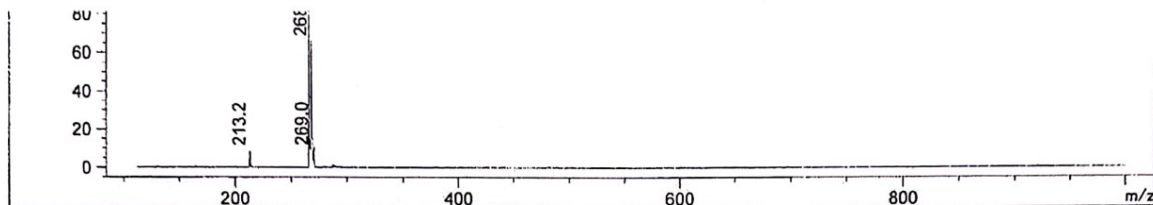

**Figure S3.** Mass spectrum for precursor (I) with mass fragment  $M^{-2} = 269$ .

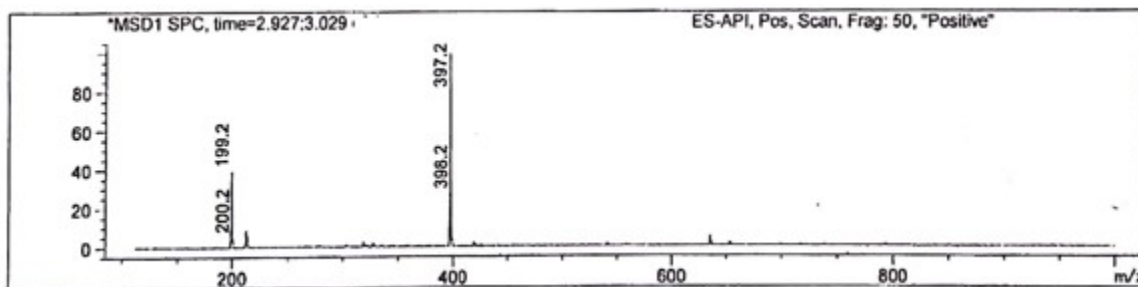

**Figure S4.** Mass spectrum for ligand (II) with mass fragment  $M^{-1} = 397$ .

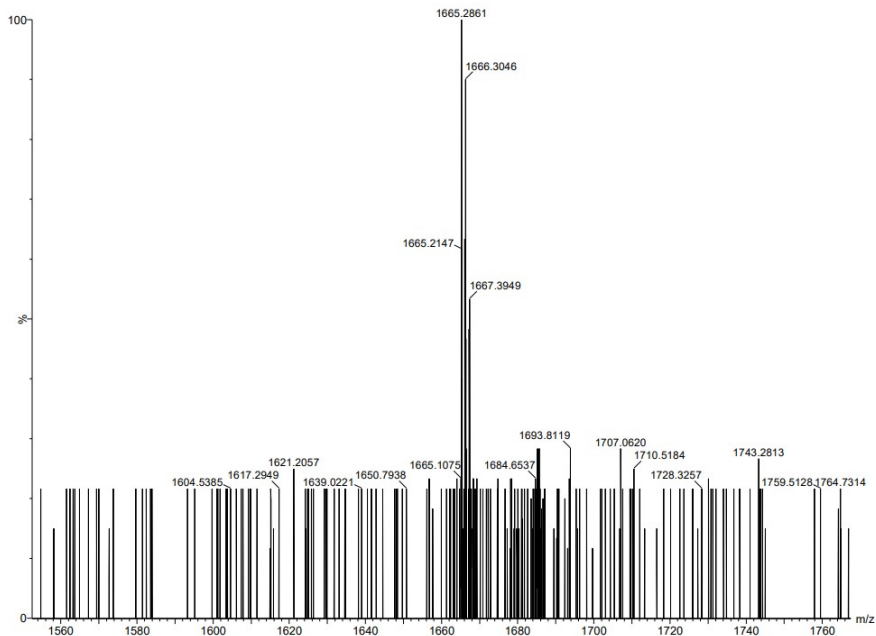

**Figure S5.** Mass spectrum for CoTBImpc (III) with mass fragment  $M^{+1} = 1665$ .

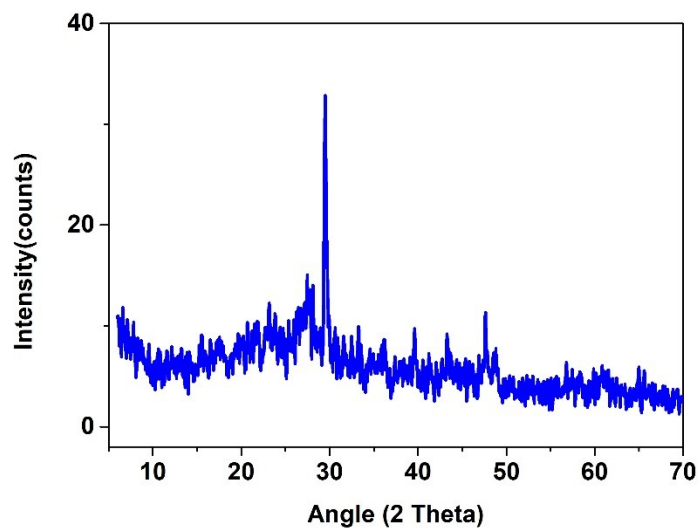

**Figure S6.** XRD profile for CoTBImpc (III) phthalocyanine complex.

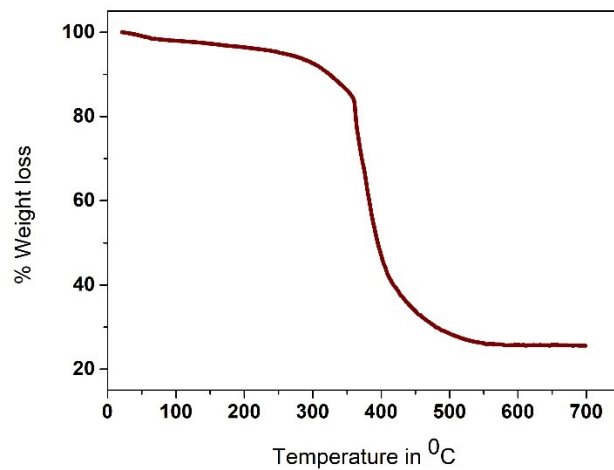

**Figure S7.** TGA analytical curve for COTBImpc(III) phthalocyanine complex.

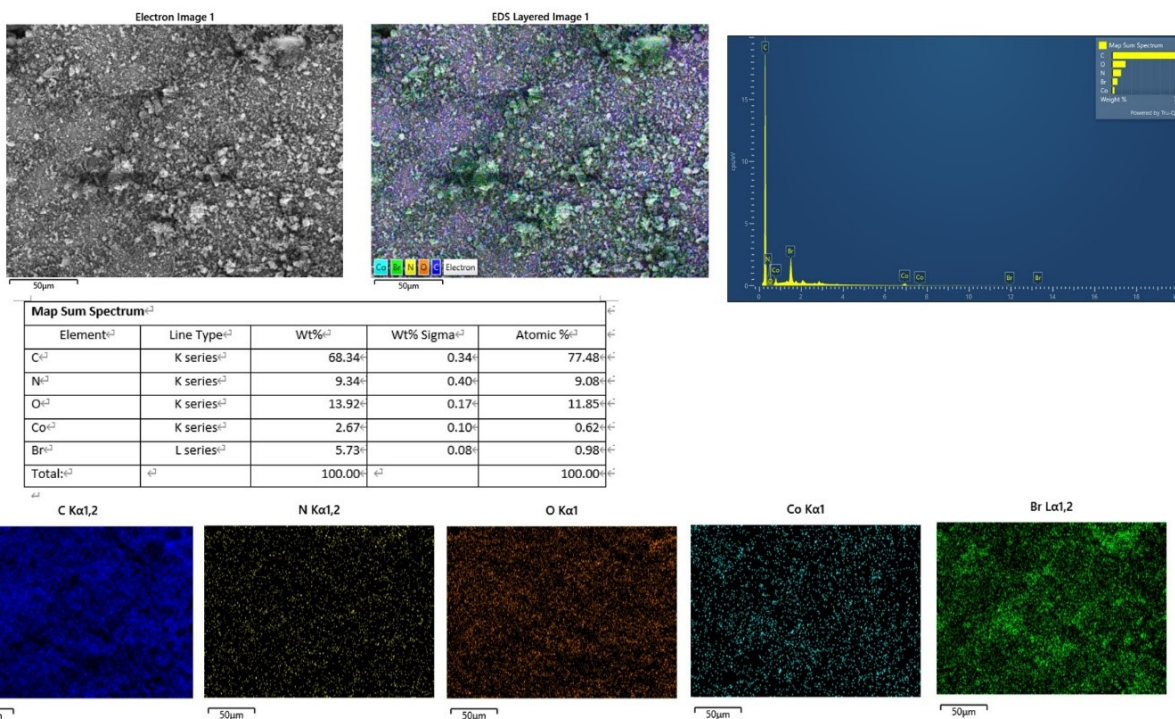

Figure S8. EDX spectra of CoTBImpc (III) phthalocyanine complex.

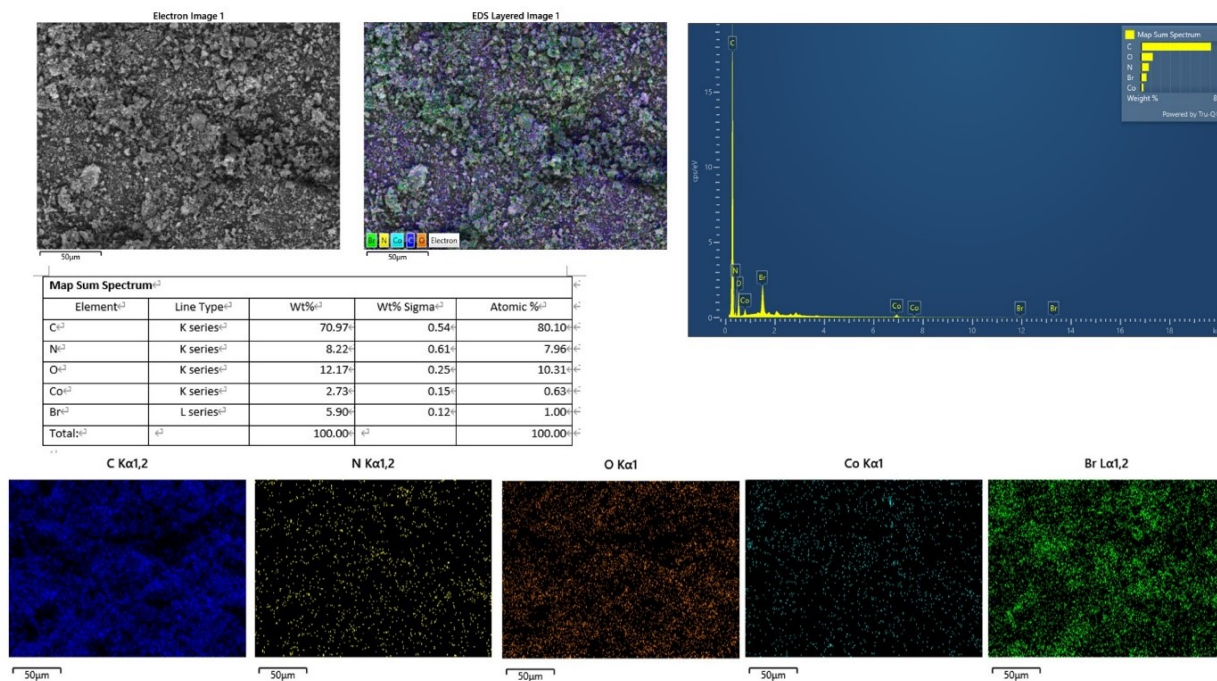

Figure S9. EDX spectra of CoTBImpc/rGO hybrid phthalocyanine complex.

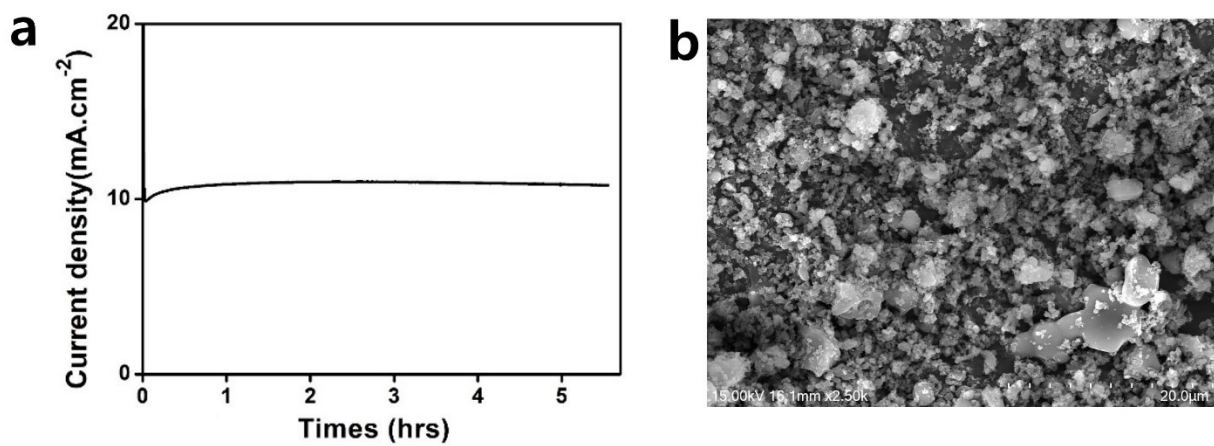

**Figure S10 a.** Stability curve for CoTBImpc/rGO hybrid; **b.** SEM image of CoTBImpc/rGO electrode after stability studies.
